# Supplementary material for: Prediction of histology by B-mode and PD-mode ultrasound across different joint locations and diseases
Source: HighWire-hosted journal article supplement (doi:10.1136/rmdopen-2022-002439), 2022-07-01
Supplement: rmdopen-2022-002439supp001_data_supplement.pdf [file rmdopen-2022-002439supp001_data_supplement.pdf]

### Prediction of histology by B- and PD-mode ultrasound across different joint locations and diseases

#### Supplement

**Supplementary Table S1:** Multivariate linear regression analysis for the prediction of total Krenn score and vascularisation based on either B- or PD-mode US score with the addition of age, sex, disease and joint location as covariables.

| <i>Predictors</i>                        | <b>Krenn total</b> |              |                  | <b>Vascularisation</b> |              |                  |
|------------------------------------------|--------------------|--------------|------------------|------------------------|--------------|------------------|
|                                          | <i>Estimates</i>   | <i>CI</i>    | <i>p</i>         | <i>Estimates</i>       | <i>CI</i>    | <i>p</i>         |
| B-mode US                                | 1.96               | 1.04 – 2.88  | <b>&lt;0.001</b> |                        |              |                  |
| PD-mode US                               |                    |              |                  | 3.85                   | 2.16 – 5.54  | <b>&lt;0.001</b> |
| Age                                      | 0.03               | -0.02 – 0.07 | 0.209            | 0.05                   | -0.05 – 0.14 | 0.339            |
| Sex [Female]                             | -0.19              | -1.44 – 1.05 | 0.751            | -0.95                  | -3.75 – 1.85 | 0.490            |
| Disease [PsA]                            | 0.18               | -1.14 – 1.50 | 0.781            | 3.27                   | 0.19 – 6.36  | <b>0.039</b>     |
| Disease [SpA]                            | -0.01              | -2.04 – 2.02 | 0.995            | 0.16                   | -4.38 – 4.69 | 0.943            |
| Disease [UA]                             | 0.68               | -0.95 – 2.30 | 0.398            | 2.26                   | -1.77 – 6.28 | 0.257            |
| Location [MCP]                           | 0.45               | -1.41 – 2.31 | 0.620            | -0.42                  | -5.14 – 4.30 | 0.855            |
| Location [MTP]                           | 1.09               | -2.11 – 4.29 | 0.486            | 0.51                   | -7.45 – 8.46 | 0.896            |
| Location [SC]                            | -1.35              | -4.97 – 2.26 | 0.446            | 0.15                   | -7.69 – 7.98 | 0.969            |
| Location [Wrist]                         | -0.27              | -1.52 – 0.98 | 0.664            | -0.66                  | -3.52 – 2.20 | 0.638            |
| Observations                             | 33                 |              |                  | 33                     |              |                  |
| R <sup>2</sup> / R <sup>2</sup> adjusted | 0.604 / 0.425      |              |                  | 0.694 / 0.555          |              |                  |

MCP = metacarpophalangeal joint, MTP = metatarsophalangeal joint, PsA = psoriatic arthritis, RA = rheumatoid arthritis, SC = sternoclavicular joint, SpA = spondyloarthritis, UA = undifferentiated arthritis, US = Ultrasound.
